# Supplementary material for: How much do tumor stage and treatment explain socioeconomic inequalities in breast cancer survival? Applying causal mediation analysis to population-based data
Source: PubMed Central journal article supplement (PMC4956701; doi:10.1007/s10654-016-0155-5), 2016-05-10
Supplement: 10654_2016_155_MOESM1_ESM.pdf [file 10654_2016_155_MOESM1_ESM.pdf]

## Appendix 1. Classification of surgical procedures

Where there are blanks, this procedure was classified as 'non-major' (or 'minor'). Non-major procedures were diagnostic, exploratory or procedures unrelated to the breast. A patient is classified as having "no surgery" if there's no OPCS-4 code.

| Surgical type | Category                       | OPCS-4 codes | Note                                                                                                     |
|---------------|--------------------------------|--------------|----------------------------------------------------------------------------------------------------------|
| Major         | Axillary Dissection            | T852         | Block dissection of axillary lymph nodes                                                                 |
| Major         | Axillary Dissection            | T858         | Other specified block dissection of lymph nodes                                                          |
| Major         | Axillary Dissection            | T859         | Unspecified block dissection of lymph nodes                                                              |
| Major         | Breast Conserving Surgery      | B281         | Quadrantectomy of breast                                                                                 |
| Major         | Breast Conserving Surgery      | B282         | Partial excision of breast, Partial mastectomy, WLE, includes wedge or segmental excision of breast NEC. |
| Major         | Breast Conserving Surgery      | B283         | Excision of lesion of breast, includes lumpectomy, excision biopsy.                                      |
| Major         | Breast Conserving Surgery      | B284         | Re-excision of breast margins                                                                            |
| Major         | Breast Conserving Surgery      | B285         | Wire guided partial excision of breast                                                                   |
| Major         | Breast Conserving Surgery      | B286         | Excision of accessory breast tissue                                                                      |
| Major         | Breast Conserving Surgery      | B288         | Other specified other excision of breast                                                                 |
| Major         | Breast Conserving Surgery      | B289         | Unspecified other excision of breast                                                                     |
| Major         | Breast Conserving Surgery      | B323         | Wire-guided biopsy of lesion of breast                                                                   |
| Major         | Breast Conserving Surgery      | B328         | Localisation biopsy/excision.                                                                            |
| Major         | Breast Conserving Surgery      | B341         | Subareolar excision of mammary duct                                                                      |
| Major         | Breast Conserving Surgery      | B342         | Excision of mammary duct NEC                                                                             |
| Major         | Breast Conserving Surgery      | B343         | Excision of lesion of mammary duct nec. Microdochectomy.                                                 |
| Major         | Breast Conserving Surgery      | B344         | Microdochotomy                                                                                           |
| Major         | Breast Conserving Surgery      | B352         | Excision of nipple                                                                                       |
| Major         | Breast Conserving Surgery      | B353         | Extirpation/removal of lesion of nipple.                                                                 |
| Major         | Breast Conserving Surgery      | B374         | Capsulectomy of breast                                                                                   |
| Major         | Breast Conserving Surgery      | B378         | Other specified other operations on breast                                                               |
| Major         | Breast Conserving Surgery      | B401         | Interstitial laser destruction of lesion of breast                                                       |
| Major         | Breast Conserving Surgery      | B408         | Destruction of lesion of breast, Other specified                                                         |
| Major         | Breast Conserving Surgery      | B409         | Destruction of lesion of breast, Unspecified                                                             |
| Major         | Other Axillary Nodal Procedure | O142         | Sentinel lymph node                                                                                      |
| Major         | Other Axillary Nodal Procedure | T862         | Sampling of axillary lymph nodes                                                                         |
| Major         | Other Axillary Nodal Procedure | T868         | Other specified sampling of lymph nodes                                                                  |
| Major         | Other Axillary Nodal Procedure | T869         | Unspecified sampling of lymph nodes                                                                      |
| Major         | Other Axillary Nodal Procedure | T873         | Excision or biopsy of axillary or supraclavicular nodes lymph nodes.                                     |
| Major         | Other Axillary Nodal Procedure | T878         | Other specified excision or biopsy of lymph node                                                         |
| Major         | Other Axillary Nodal Procedure | T879         | Unspecified excision or biopsy of lymph node                                                             |
| Major         | Other Axillary Nodal Procedure | T888         | Other specified drainage of lesion of lymph node                                                         |
| Major         | Other Axillary Nodal Procedure | T911         | Biopsy of sentinel lymph node NEC                                                                        |
| Major         | Other Axillary Nodal Procedure | T912         | Scanning of sentinel lymph node                                                                          |
| Major         | Other Axillary Nodal Procedure | T918         | Other specified operations on sentinel lymph node                                                        |
| Major         | Other Axillary Nodal Procedure | T919         | Unspecified operations on sentinel lymph node                                                            |
| Major         | Other Axillary Nodal Procedure | T929         | Unspecified other operations on lymphatic tissue                                                         |
| Major         | Plastics Procedures            | B291         | Reconstruction of breast using myocutaneous flap of latissimus dorsi muscle                              |
| Major         | Plastics Procedures            | B292         | Reconstruction of breast using local flap of skin NEC                                                    |
| Major         | Plastics Procedures            | B293         | Reconstruction of breast using flap of skin of abdomen NEC                                               |
| Major         | Plastics Procedures            | B294         | Reconstruction of breast using distant flap of skin NEC                                                  |
| Major         | Plastics Procedures            | B295         | Revision of reconstruction of breast                                                                     |
| Major         | Plastics Procedures            | B298         | Other specified reconstruction of breast                                                                 |
| Major         | Plastics Procedures            | B299         | Unspecified reconstruction of breast                                                                     |
| Major         | Plastics Procedures            | B301         | Insertion of prosthesis for breast                                                                       |

|       |                                        |      |                                                                                                                                   |
|-------|----------------------------------------|------|-----------------------------------------------------------------------------------------------------------------------------------|
| Major | Plastics Procedures                    | B302 | Revision of prosthesis for breast                                                                                                 |
| Major | Plastics Procedures                    | B303 | Removal of prosthesis for breast                                                                                                  |
| Major | Plastics Procedures                    | B308 | Other specified prosthesis for breast                                                                                             |
| Major | Plastics Procedures                    | B309 | Unspecified prosthesis for breast                                                                                                 |
| Major | Plastics Procedures                    | B311 | Reduction mammoplasty                                                                                                             |
| Major | Plastics Procedures                    | B312 | Augmentation mammoplasty                                                                                                          |
| Major | Plastics Procedures                    | B313 | Mastopexy                                                                                                                         |
| Major | Plastics Procedures                    | B314 | Revision of mammoplasty                                                                                                           |
| Major | Plastics Procedures                    | B318 | Other specified other plastic operations on breast                                                                                |
| Major | Plastics Procedures                    | B319 | Unspecified other plastic operations on breast                                                                                    |
| Major | Plastics Procedures                    | B351 | Transposition of nipple                                                                                                           |
| Major | Plastics Procedures                    | B354 | Plastic operations on nipple                                                                                                      |
| Major | Plastics Procedures                    | B356 | Eversion of nipple                                                                                                                |
| Major | Plastics Procedures                    | B358 | Other specified operations on nipple                                                                                              |
| Major | Plastics Procedures                    | B359 | Unspecified operations on nipple                                                                                                  |
| Major | Plastics Procedures                    | B361 | Reconstruction of nipple                                                                                                          |
| Major | Plastics Procedures                    | B362 | Nipple sharing using other tissue                                                                                                 |
| Major | Plastics Procedures                    | B363 | Nipple sharing NEC                                                                                                                |
| Major | Plastics Procedures                    | B364 | Tattooing of nipple                                                                                                               |
| Major | Plastics Procedures                    | B368 | Other specified reconstruction of nipple and areola                                                                               |
| Major | Plastics Procedures                    | B369 | Unspecified reconstruction of nipple and areola                                                                                   |
| Major | Plastics Procedures                    | B381 | Reconstruction of breast using free superior gluteal artery perforator flap                                                       |
| Major | Plastics Procedures                    | B382 | Reconstruction of breast using free inferior gluteal artery perforator flap                                                       |
| Major | Plastics Procedures                    | B388 | Other specified reconstruction of breast using flap of skin of buttock                                                            |
| Major | Plastics Procedures                    | B389 | Unspecified reconstruction of breast using flap of skin of buttock                                                                |
| Major | Plastics Procedures                    | B391 | Reconstruction of breast using free transverse rectus abdominis myocutaneous (TRAM) flap                                          |
| Major | Plastics Procedures                    | B392 | Reconstruction of breast using pedicled transverse rectus abdominis myocutaneous (TRAM) flap                                      |
| Major | Plastics Procedures                    | B393 | Reconstruction of breast using free deep inferior epigastric perforator (DIEP)flap                                                |
| Major | Plastics Procedures                    | B398 | Other specified reconstruction of breast using transverse rectus abdominis myocutaneous (TRAM)                                    |
| Major | Plastics Procedures                    | B399 | Unspecified reconstruction of breast using transverse rectus abdominis myocutaneous (TRAM)                                        |
| Major | Total Mastectomy                       | B271 | Total mastectomy and excision of both pectoral muscles and part of chest wall                                                     |
| Major | Total Mastectomy                       | B273 | Patey mastectomy /modified radical mastectomy (plus node excision T852), Total mastectomy and excision of pectoralis minor muscle |
| Major | Total Mastectomy                       | B274 | Total mastectomy NEC, inc toilet and simple mastectomy, extended simple mastectomy.                                               |
| Major | Total Mastectomy                       | B275 | Subcutaneous mastectomy                                                                                                           |
| Major | Total Mastectomy                       | B276 | Skin sparing mastectomy                                                                                                           |
| Major | Total Mastectomy                       | B278 | Total excision of breast other specified.                                                                                         |
| Major | Total Mastectomy                       | B279 | Unspecified, Mastectomy NEC.                                                                                                      |
| Major | Total Mastectomy + Axillary Dissection | B272 | Radical mastectomy/total mastectomy and excision of both pectoral muscles NEC.                                                    |
| Minor |                                        | B321 | Percutaneous biopsy of lesion of breast                                                                                           |
| Minor |                                        | B322 | Biopsy of lesion of breast NEC                                                                                                    |
| Minor |                                        | B329 | Unspecified biopsy of breast                                                                                                      |
| Minor |                                        | B331 | Drainage of lesion of breast                                                                                                      |
| Minor |                                        | B332 | Capsulotomy of breast                                                                                                             |
| Minor |                                        | B333 | Exploration of breast                                                                                                             |
| Minor |                                        | B338 | Other specified incision of breast                                                                                                |
| Minor |                                        | B339 | Unspecified incision of breast                                                                                                    |
| Minor |                                        | B345 | Exploration of mamillary duct NEC                                                                                                 |
| Minor |                                        | B348 | Other specified operations on duct of breast                                                                                      |
| Minor |                                        | B349 | Unspecified operations on duct of breast                                                                                          |
| Minor |                                        | B355 | Biopsy of lesion of nipple                                                                                                        |

|       |      |                                                      |
|-------|------|------------------------------------------------------|
| Minor | B371 | Aspiration of lesion of breast                       |
| Minor | B372 | Injection into breast                                |
| Minor | B373 | Extraction of milk from breast                       |
| Minor | B379 | Unspecified other operations on breast               |
| Minor | T851 | Block dissection of cervical lymph nodes             |
| Minor | T863 | Sampling of supraclavicular lymph nodes              |
| Minor | T864 | Sampling of internal mammary lymph nodes             |
| Minor | T881 | Drainage of lesion of cervical lymph node            |
| Minor | T882 | Drainage of lesion of axillary lymph node            |
| Minor | T883 | Drainage of lesion of inguinal lymph node            |
| Minor | T889 | Unspecified drainage of lesion of lymph node         |
| Minor | T891 | Reconstruction of lymphatic duct                     |
| Minor | T892 | Bypass of obstruction of lymphatic duct              |
| Minor | T893 | Ligation of lymphatic duct                           |
| Minor | T894 | Cannulation of lymphatic duct                        |
| Minor | T898 | Other specified operations on lymphatic duct         |
| Minor | T899 | Unspecified operations on lymphatic duct             |
| Minor | T928 | Other specified other operations on lymphatic tissue |
