# Supplementary material for: How much do tumor stage and treatment explain socioeconomic inequalities in breast cancer survival? Applying causal mediation analysis to population-based data
Source: PubMed Central journal article supplement (PMC4956701; doi:10.1007/s10654-016-0155-5), 2016-05-10
Supplement: 10654_2016_155_MOESM3_ESM.pdf [file 10654_2016_155_MOESM3_ESM.pdf]

### Appendix 3

#### Technical details underpinning the three mediation analyses

##### Analysis one: effect of deprivation on survival status, with stage as mediator

Let  $S_{most|C}^*$  be a random draw from the distribution of *Stage* given baseline confounders  $C$  (i.e. calendar year of diagnosis and region) amongst the most deprived patients, and let  $S_{least|C}^*$  be a random draw from the distribution of *Stage* given  $C$  amongst the least deprived patients. Then, following Vanderweele, Vansteelandt and Robins (Epidemiology, 2014),(1) we define the **randomized interventional analogue of the natural indirect effect (RIANIE)** as the log odds ratio of death comparing:

- setting stage to random draws (given baseline confounders) of the distribution of stage amongst the most deprived, to
- setting stage to random draws (given baseline confounders) of the distribution of stage amongst the least deprived,

if, under both scenarios, everyone were set to be most deprived. Written mathematically:

$$RIANIE = \log \left( \text{odds} \left( Y(\text{most}, S_{most|C}^*) \right) \right) - \log \left( \text{odds} \left( Y(\text{most}, S_{least|C}^*) \right) \right)$$

where

- $Y$  is the survival status,  $Y=1$  for death, 0 for alive
- $\text{Odds}(Y) = \text{Pr}(Y = 1) / \text{Pr}(Y = 0)$
- $Y(\text{most}, s)$  is the potential value of  $Y$  when deprivation is set to *most deprived*, and *Stage* is set to  $s$ .

The **randomized interventional analogue of natural direct effect (RIANDE)** is the log odds ratio of death, if everyone had their stage set to be a random draw (given confounders) of the distribution of stage amongst the least deprived, comparing setting their deprivation level to most versus least deprived. Written mathematically:

$$RIANDE = \log \left( \text{odds} \left( Y(\text{most}, S_{least|C}^*) \right) \right) - \log \left( \text{odds} \left( Y(\text{least}, S_{least|C}^*) \right) \right)$$

The **randomised intervention analogue of the total causal effect (RIATCE)** is the log odds ratio of death comparing:

- setting deprivation to most deprived and stage to a random draw (given baseline confounders) of the distribution of stage amongst the most deprived, versus
- setting deprivation to least deprived and stage to a random draw (given baseline confounders) of the distribution of stage amongst the least deprived.

Written mathematically:

$$RIATCE = \log \left( \text{odds} \left( Y(\text{most}, S_{\text{most}|C}^*) \right) \right) - \log \left( \text{odds} \left( Y(\text{least}, S_{\text{least}|C}^*) \right) \right)$$

This is the sum of the *randomized interventional analogues of the natural direct and indirect effects*.

**Similarly, for analysis two: effect of deprivation on survival status, with treatment as mediator**

Let  $T_{\text{most}|C}^*$  be a random draw from the distribution of *Treatment* given baseline confounders  $C$  (i.e. calendar year of diagnosis and region) amongst the most deprived patients, and let  $T_{\text{least}|C}^*$  be a random draw from the distribution of *Treatment* given  $C$  amongst the least deprived patients. Then we have:

$$RIANIE = \log \left( \text{odds} \left( Y(\text{most}, T_{\text{most}|C}^*) \right) \right) - \log \left( \text{odds} \left( Y(\text{most}, T_{\text{least}|C}^*) \right) \right)$$

$$RIANDE = \log \left( \text{odds} \left( Y(\text{most}, T_{\text{least}|C}^*) \right) \right) - \log \left( \text{odds} \left( Y(\text{least}, T_{\text{least}|C}^*) \right) \right)$$

$$RIATCE = \log \left( \text{odds} \left( Y(\text{most}, T_{\text{most}|C}^*) \right) \right) - \log \left( \text{odds} \left( Y(\text{least}, T_{\text{least}|C}^*) \right) \right)$$

where now  $Y(\text{most}, t)$  is the potential value of  $Y$  when deprivation is set to *most deprived*, and *Treatment* is set to  $t$ .

**For analysis three: effect of deprivation on treatment, with stage as mediator**

$$RIANIE = \log \left( \text{odds} \left( T(\text{most}, S_{\text{most}|C}^*) \right) \right) - \log \left( \text{odds} \left( T(\text{most}, S_{\text{least}|C}^*) \right) \right)$$

$$RIANDE = \log \left( \text{odds} \left( T(\text{most}, S_{\text{least}|C}^*) \right) \right) - \log \left( \text{odds} \left( T(\text{least}, S_{\text{least}|C}^*) \right) \right)$$

$$RIATCE = \log \left( \text{odds} \left( T(\text{most}, S_{\text{most}|C}^*) \right) \right) - \log \left( \text{odds} \left( T(\text{least}, S_{\text{least}|C}^*) \right) \right)$$

where

- $T$  is surgical treatment,  $T=1$  for major surgery, 0 for minor/no surgical procedures, and
- $T(\text{most}, s)$  is the potential value of  $T$  when deprivation is set to *most deprived*, and *Stage* is set to  $s$ .

**The *proportion mediated (PM)* is defined as**

$$PM = \frac{RIANIE}{RIATCE}$$

1. VanderWeele TJ, Vansteelandt S, Robins JM. Effect Decomposition in the Presence of an Exposure-Induced Mediator-Outcome Confounder. *Epidemiology*. 2014;25(2):300-6.
