# Supplementary material for: How much do tumor stage and treatment explain socioeconomic inequalities in breast cancer survival? Applying causal mediation analysis to population-based data
Source: PubMed Central journal article supplement (PMC4956701; doi:10.1007/s10654-016-0155-5), 2016-05-10
Supplement: 10654_2016_155_MOESM5_ESM.pdf [file 10654_2016_155_MOESM5_ESM.pdf]

Appendix 5: One-year and five-year net survival for women diagnosed with breast cancer, Yorkshire and North East (England), 2000-07

| Year                       | Deprivation    | STAGE ALL |                 |     | STAGE I |                 |     | STAGE II |                 |     | STAGE III |                 |     | STAGE IV |                 |     | MISSING |                 |     |
|----------------------------|----------------|-----------|-----------------|-----|---------|-----------------|-----|----------|-----------------|-----|-----------|-----------------|-----|----------|-----------------|-----|---------|-----------------|-----|
|                            |                | NS        | lci             | uci | NS      | lci             | uci | NS       | lci             | uci | NS        | lci             | uci | NS       | lci             | uci | NS      | lci             | uci |
| One year after diagnosis   | Least deprived | 0.97      | ( 0.97 - 0.98 ) |     | 1.00    | ( 1.00 - 1.00 ) |     | 0.99     | ( 0.99 - 1.00 ) |     | 0.95      | ( 0.92 - 0.97 ) |     | 0.55     | ( 0.48 - 0.62 ) |     | 0.90    | ( 0.86 - 0.94 ) |     |
|                            | 2              | 0.96      | ( 0.96 - 0.97 ) |     | 1.00    | ( 0.99 - 1.00 ) |     | 0.99     | ( 0.99 - 1.00 ) |     | 0.89      | ( 0.86 - 0.92 ) |     | 0.55     | ( 0.49 - 0.61 ) |     | 0.85    | ( 0.81 - 0.88 ) |     |
|                            | 3              | 0.95      | ( 0.95 - 0.96 ) |     | 0.99    | ( 0.99 - 1.00 ) |     | 0.99     | ( 0.98 - 1.00 ) |     | 0.91      | ( 0.88 - 0.94 ) |     | 0.54     | ( 0.48 - 0.60 ) |     | 0.84    | ( 0.81 - 0.88 ) |     |
|                            | 4              | 0.94      | ( 0.94 - 0.95 ) |     | 1.00    | ( 0.99 - 1.00 ) |     | 0.98     | ( 0.97 - 0.99 ) |     | 0.91      | ( 0.88 - 0.94 ) |     | 0.51     | ( 0.46 - 0.57 ) |     | 0.82    | ( 0.78 - 0.85 ) |     |
|                            | Most deprived  | 0.94      | ( 0.93 - 0.94 ) |     | 1.00    | ( 0.99 - 1.00 ) |     | 0.98     | ( 0.98 - 0.99 ) |     | 0.92      | ( 0.89 - 0.95 ) |     | 0.44     | ( 0.40 - 0.49 ) |     | 0.80    | ( 0.77 - 0.84 ) |     |
| Five years after diagnosis | Least deprived | 0.86      | ( 0.84 - 0.87 ) |     | 0.96    | ( 0.94 - 0.98 ) |     | 0.86     | ( 0.84 - 0.89 ) |     | 0.66      | ( 0.58 - 0.73 ) |     | 0.12     | ( 0.06 - 0.17 ) |     | 0.75    | ( 0.65 - 0.85 ) |     |
|                            | 2              | 0.83      | ( 0.82 - 0.85 ) |     | 0.96    | ( 0.94 - 0.98 ) |     | 0.84     | ( 0.82 - 0.87 ) |     | 0.60      | ( 0.53 - 0.67 ) |     | 0.14     | ( 0.08 - 0.19 ) |     | 0.62    | ( 0.55 - 0.70 ) |     |
|                            | 3              | 0.82      | ( 0.80 - 0.83 ) |     | 0.94    | ( 0.92 - 0.96 ) |     | 0.86     | ( 0.83 - 0.88 ) |     | 0.61      | ( 0.54 - 0.69 ) |     | 0.14     | ( 0.08 - 0.20 ) |     | 0.57    | ( 0.49 - 0.64 ) |     |
|                            | 4              | 0.80      | ( 0.78 - 0.82 ) |     | 0.96    | ( 0.94 - 0.98 ) |     | 0.84     | ( 0.82 - 0.87 ) |     | 0.52      | ( 0.45 - 0.59 ) |     | 0.14     | ( 0.09 - 0.19 ) |     | 0.56    | ( 0.48 - 0.64 ) |     |
|                            | Most deprived  | 0.76      | ( 0.74 - 0.78 ) |     | 0.95    | ( 0.92 - 0.97 ) |     | 0.80     | ( 0.77 - 0.82 ) |     | 0.53      | ( 0.46 - 0.60 ) |     | 0.11     | ( 0.07 - 0.15 ) |     | 0.49    | ( 0.41 - 0.56 ) |     |
