# Supplementary material for: How much do tumor stage and treatment explain socioeconomic inequalities in breast cancer survival? Applying causal mediation analysis to population-based data
Source: PubMed Central journal article supplement (PMC4956701; doi:10.1007/s10654-016-0155-5), 2016-05-10
Supplement: 10654_2016_155_MOESM6_ESM.pdf [file 10654_2016_155_MOESM6_ESM.pdf]

Appendix 6: Effects of deprivation on mortality, mediated via stage at diagnosis

| Deprivation                                       | Effect:               |                 |      |           |      |      | Proportion mediated: |       |        |                            |       |       |       |
|---------------------------------------------------|-----------------------|-----------------|------|-----------|------|------|----------------------|-------|--------|----------------------------|-------|-------|-------|
|                                                   | Total                 |                 |      | via stage |      |      | via stage§           |       |        | from sensitivity analysis* |       |       |       |
|                                                   | OR                    | LCI             | UCI  | OR        | LCI  | UCI  | PM                   | LCI   | UCI    | PM                         | LCI   | UCI   |       |
| <b>At 6 months</b>                                | <i>Least deprived</i> | <i>Baseline</i> |      |           |      |      |                      |       |        |                            |       |       |       |
|                                                   | 2                     | 1.42            | 1.14 | 1.76      | 0.82 | 0.73 | 0.91                 | -0.59 | -2.14  | 0.96                       | -0.02 | -2.27 | 2.23  |
|                                                   | 3                     | 1.98            | 1.60 | 2.45      | 0.97 | 0.88 | 1.08                 | -0.04 | -0.23  | 0.15                       | -0.05 | -0.19 | 0.09  |
|                                                   | 4                     | 2.22            | 1.77 | 2.77      | 0.92 | 0.84 | 1.01                 | -0.10 | -0.23  | 0.03                       | 0.01  | -0.12 | 0.15  |
|                                                   | <i>Most deprived</i>  | 2.77            | 2.17 | 3.53      | 1.43 | 1.27 | 1.62                 | 0.35  | 0.23   | 0.48                       | 0.25  | 0.05  | 0.46  |
| <b>At 1 year conditioning on 6-month survival</b> | <i>Least deprived</i> | <i>Baseline</i> |      |           |      |      |                      |       |        |                            |       |       |       |
|                                                   | 2                     | 1.29            | 0.98 | 1.71      | 0.91 | 0.81 | 1.02                 | -0.38 | -13.19 | 12.44                      | -0.84 | -7.02 | 5.35  |
|                                                   | 3                     | 1.47            | 1.12 | 1.93      | 1.02 | 0.92 | 1.13                 | 0.05  | -1.24  | 1.33                       | 0.00  | -1.98 | 1.98  |
|                                                   | 4                     | 1.75            | 1.35 | 2.27      | 1.10 | 1.00 | 1.22                 | 0.17  | -0.08  | 0.43                       | -0.08 | -1.14 | 0.98  |
|                                                   | <i>Most deprived</i>  | 1.93            | 1.49 | 2.50      | 1.21 | 1.08 | 1.36                 | 0.30  | 0.05   | 0.54                       | 0.42  | -1.33 | 2.18  |
| <b>At 3 years conditioning on 1-year survival</b> | <i>Least deprived</i> | <i>Baseline</i> |      |           |      |      |                      |       |        |                            |       |       |       |
|                                                   | 2                     | 1.38            | 1.19 | 1.60      | 0.93 | 0.87 | 0.99                 | -0.24 | -0.54  | 0.06                       | -0.14 | -0.53 | 0.24  |
|                                                   | 3                     | 1.40            | 1.21 | 1.62      | 0.96 | 0.90 | 1.02                 | -0.12 | -1.10  | 0.86                       | 0.00  | -0.83 | 0.83  |
|                                                   | 4                     | 1.70            | 1.48 | 1.96      | 0.98 | 0.92 | 1.04                 | -0.04 | -0.16  | 0.09                       | -0.03 | -0.16 | 0.10  |
|                                                   | <i>Most deprived</i>  | 1.98            | 1.73 | 2.26      | 1.09 | 1.03 | 1.15                 | 0.12  | 0.04   | 0.21                       | 0.18  | 0.05  | 0.30  |
| <b>At 5 years conditioning on 3-year survival</b> | <i>Least deprived</i> | <i>Baseline</i> |      |           |      |      |                      |       |        |                            |       |       |       |
|                                                   | 2                     | 1.10            | 0.90 | 1.33      | 1.01 | 0.93 | 1.09                 | 0.11  | -8.74  | 8.96                       | 0.08  | -9.96 | 10.12 |
|                                                   | 3                     | 1.26            | 1.04 | 1.52      | 1.03 | 0.95 | 1.11                 | 0.13  | -2.12  | 2.39                       | 0.08  | -3.70 | 3.85  |
|                                                   | 4                     | 1.33            | 1.10 | 1.61      | 1.02 | 0.94 | 1.10                 | 0.06  | -3.07  | 3.19                       | 0.01  | -4.13 | 4.16  |
|                                                   | <i>Most deprived</i>  | 1.67            | 1.39 | 2.00      | 1.08 | 1.00 | 1.16                 | 0.14  | -0.03  | 0.31                       | 0.22  | -0.70 | 1.13  |

§ The null hypothesis is 0, i.e. no effect is mediated via the mediator(s). A PM of 1 means that all of the total effect is mediated via the mediator(s)

\* Sensitivity analysis: both age and stage at diagnosis are considered as mediators together
